# Supplementary material
Source: PubMed Central journal article supplement (PMC3349888)

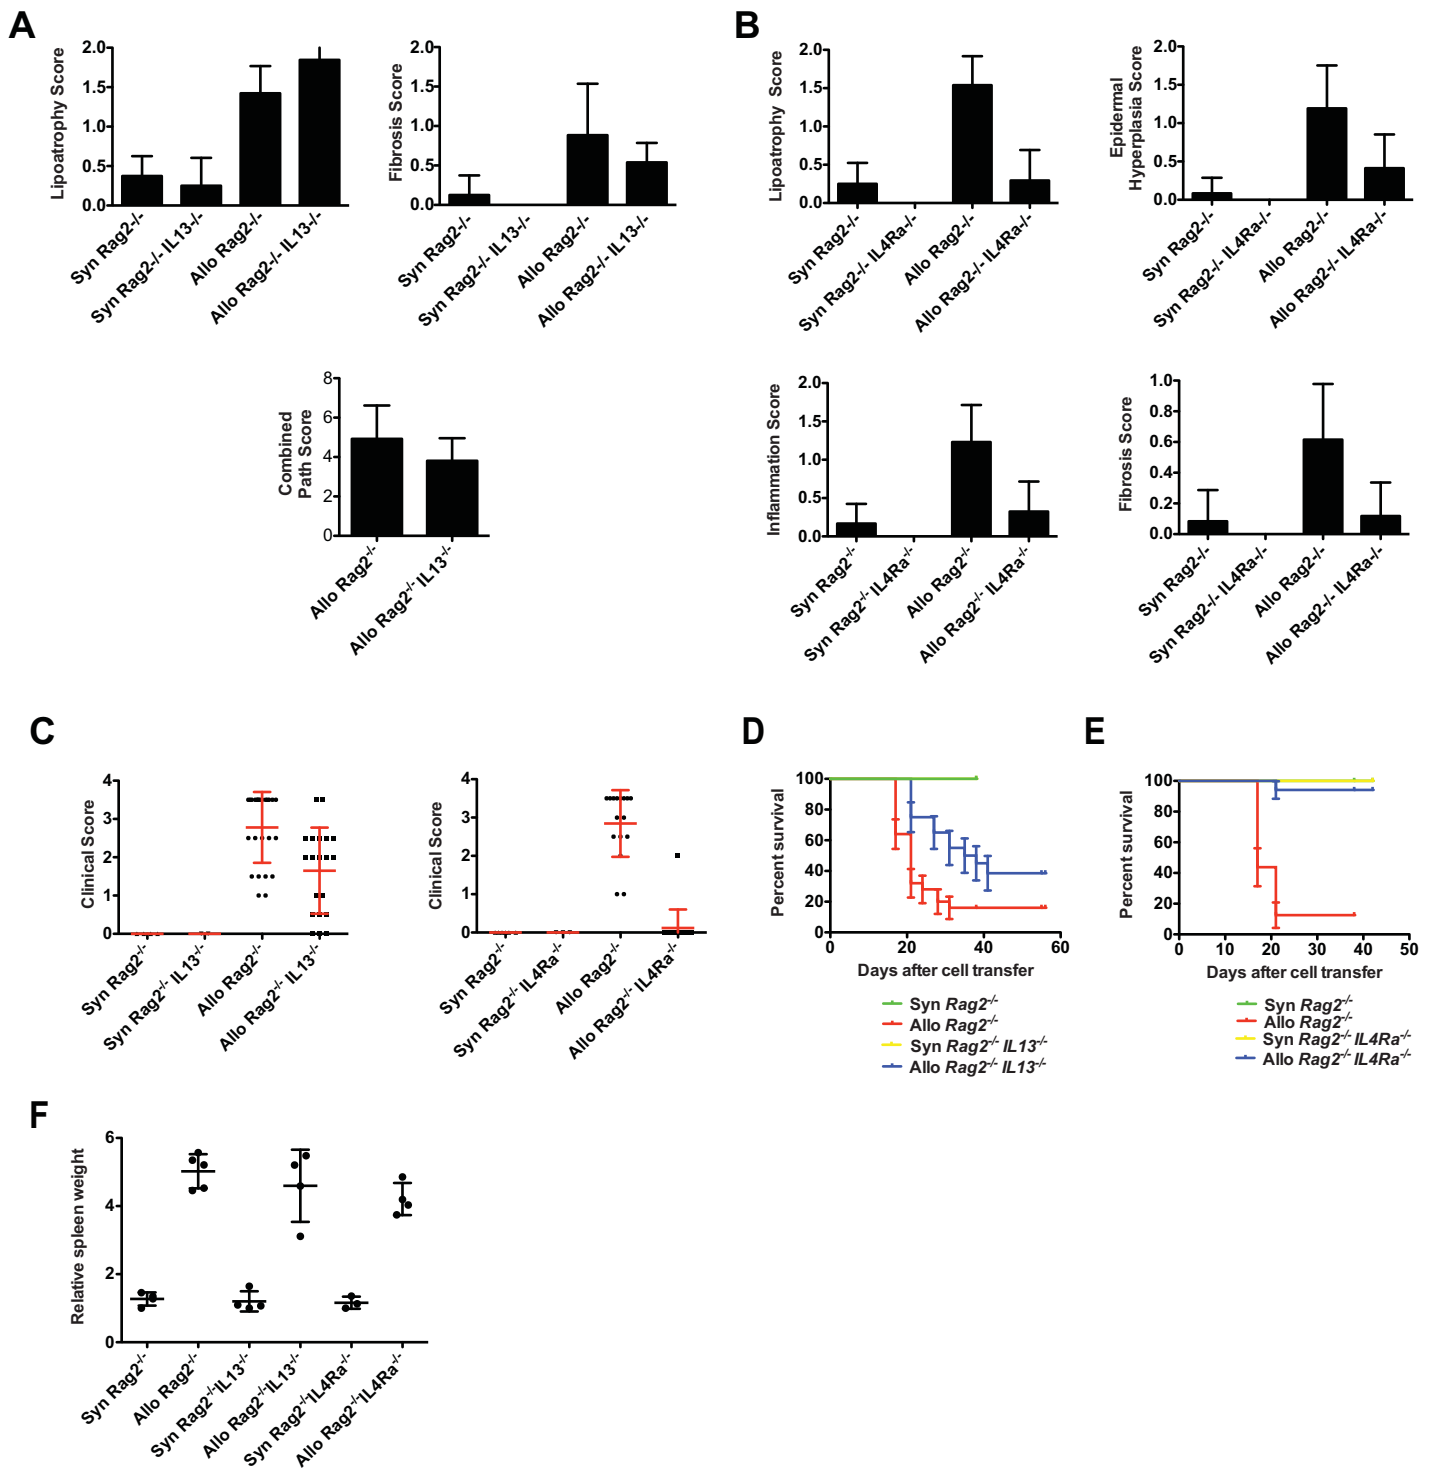

Supplemental Figure S1

Supplement: mmc1.pdf [file mmc1.pdf]

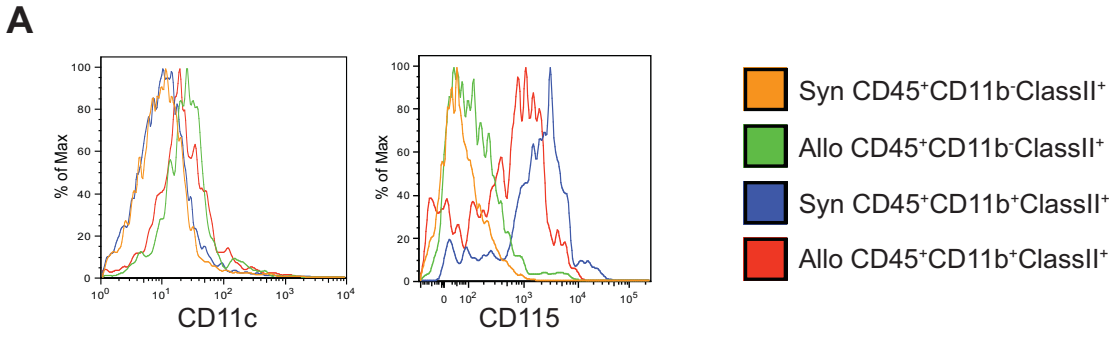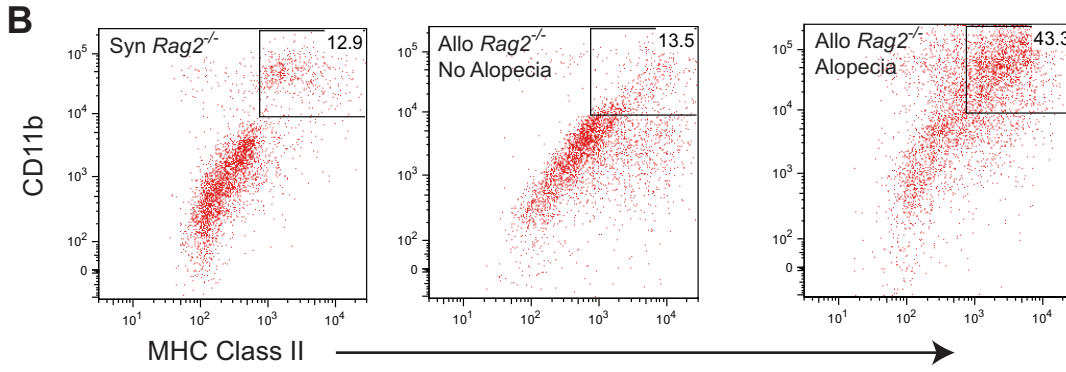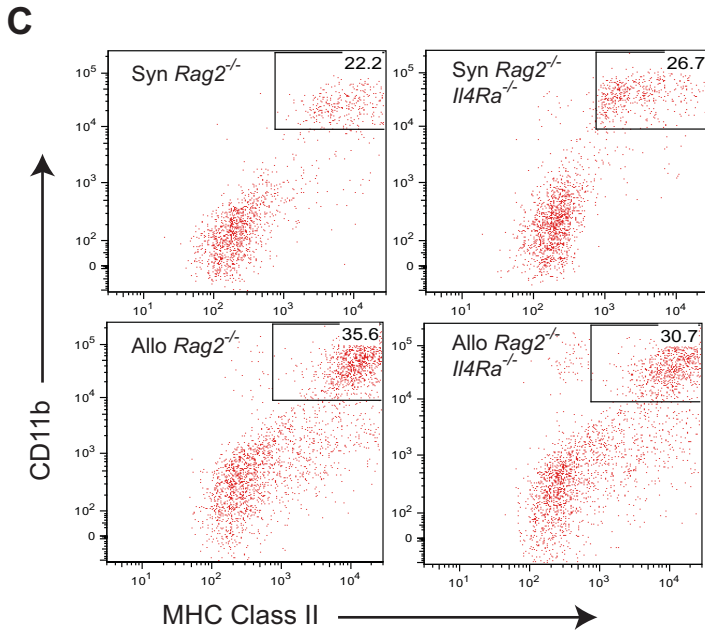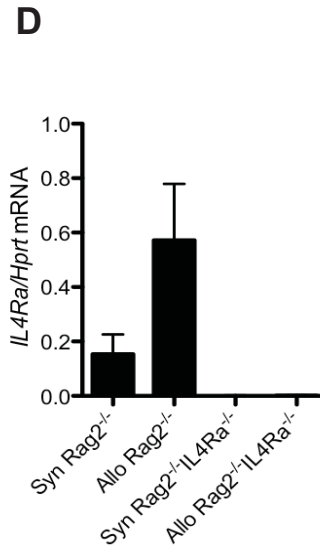

**Supplemental Figure S2**

Supplement: mmc2.pdf [file mmc2.pdf]

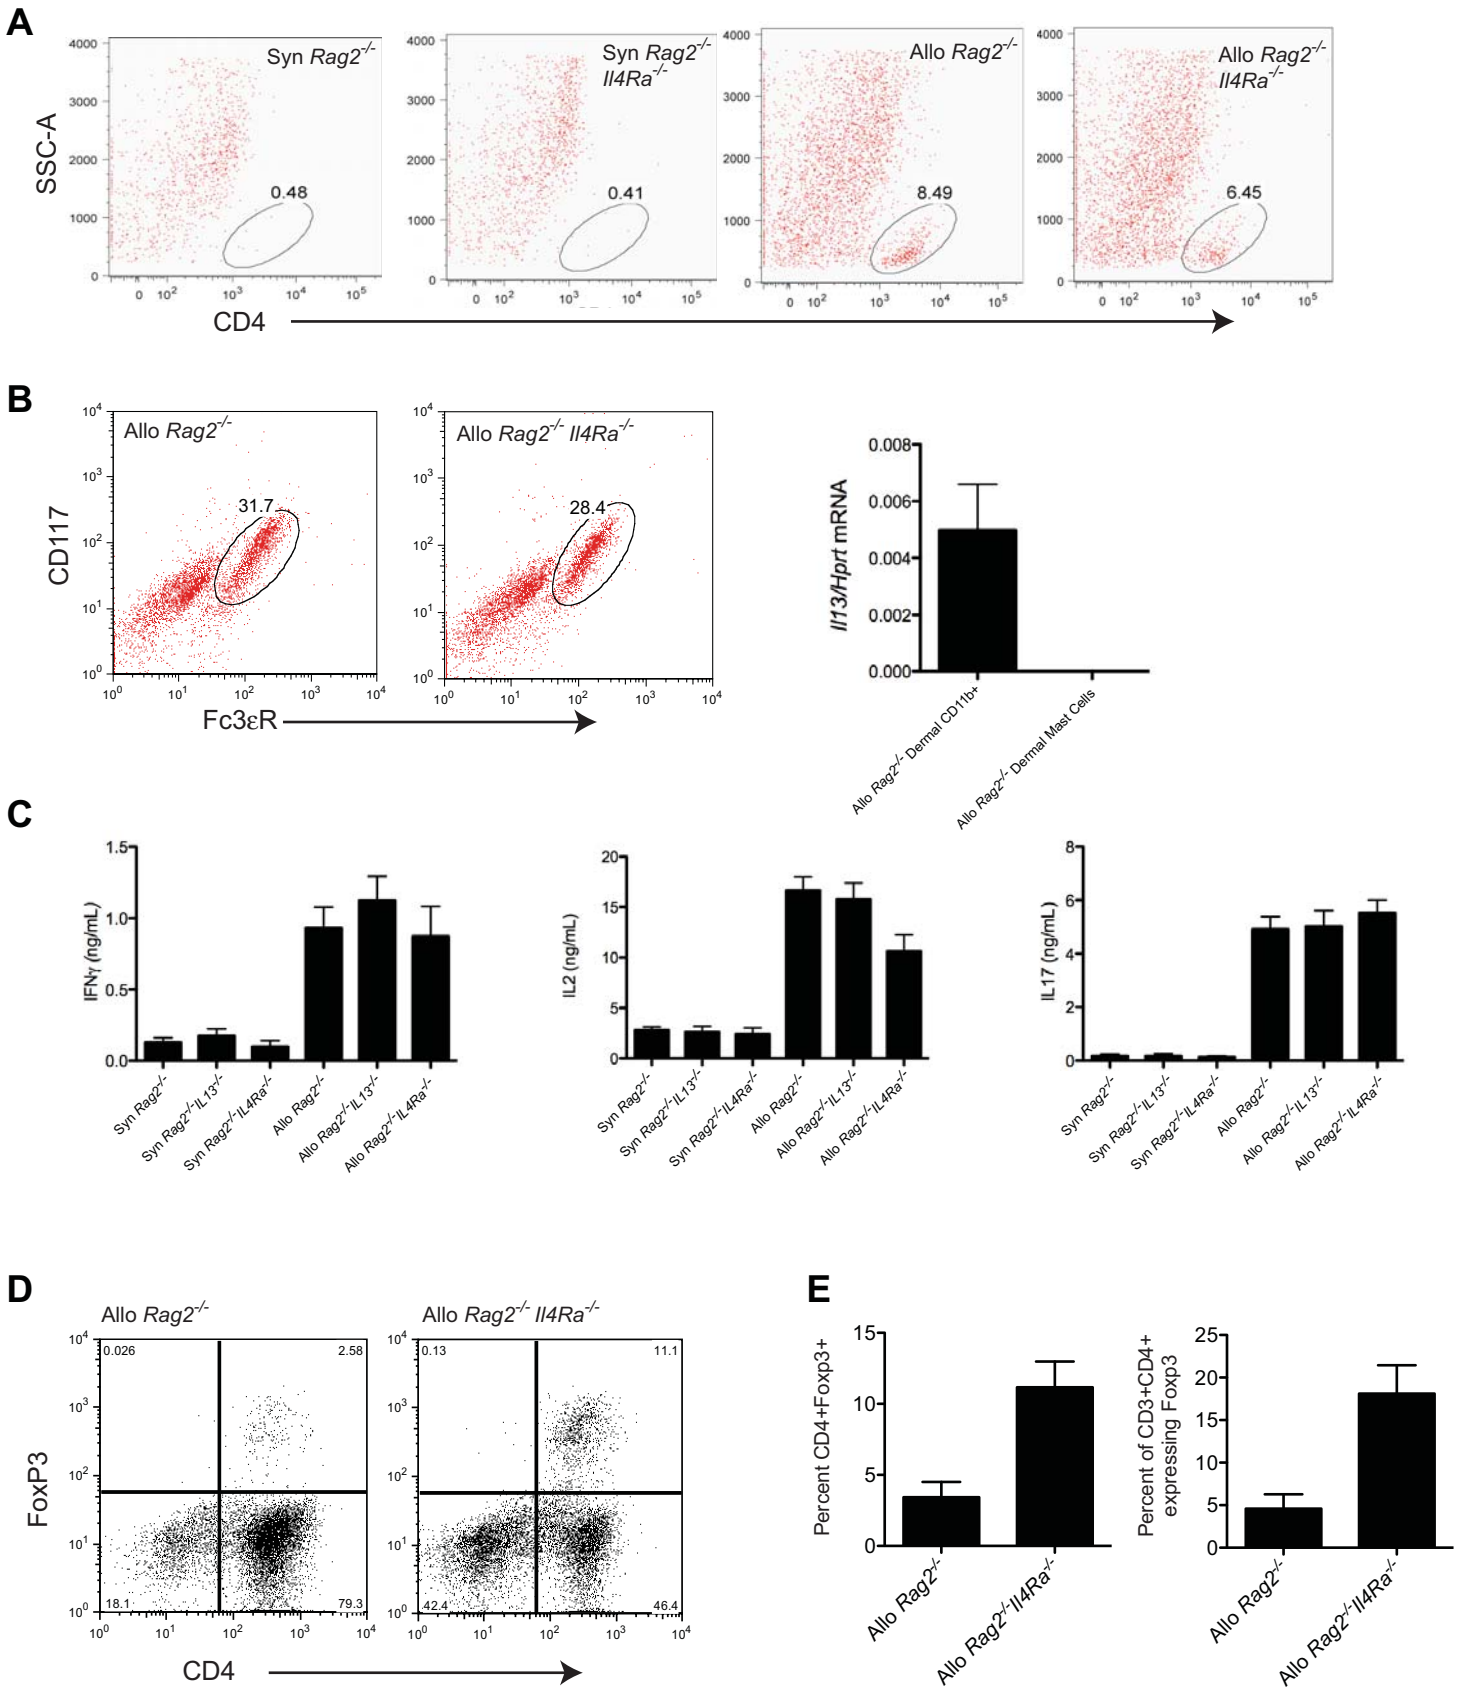

Supplemental Figure S3

Supplement: mmc3.pdf [file mmc3.pdf]

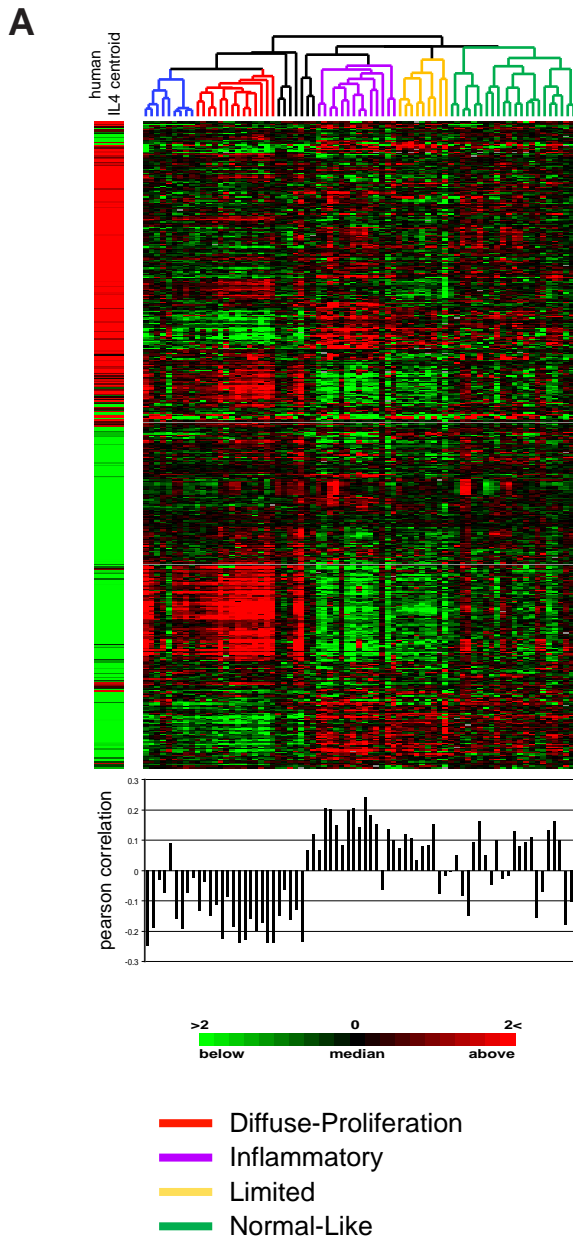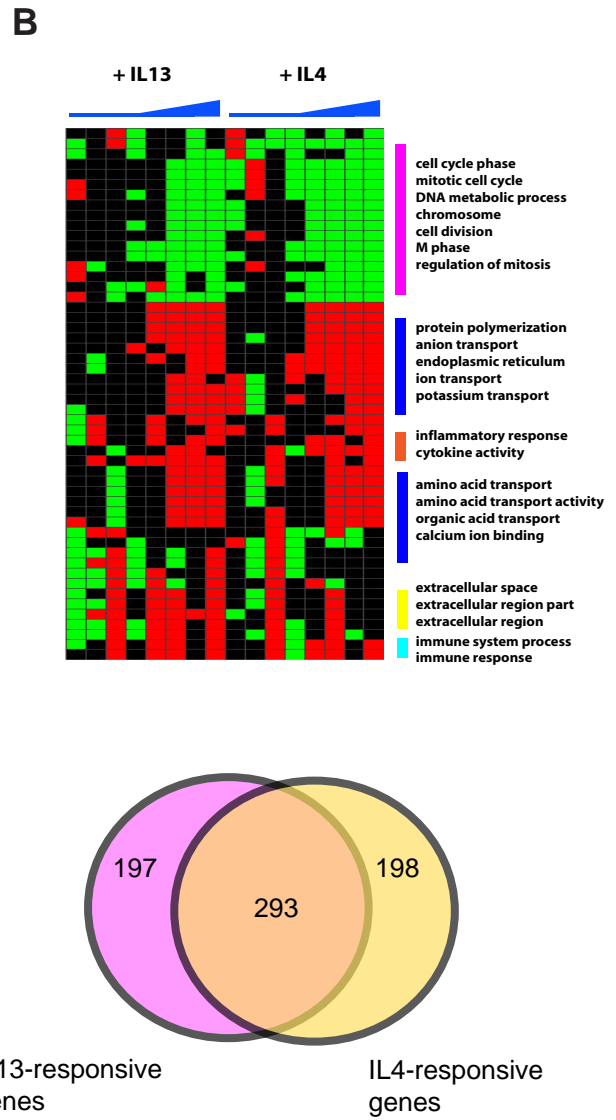

**Supplemental Figure S4**

Supplement: mmc4.pdf [file mmc4.pdf]

**A**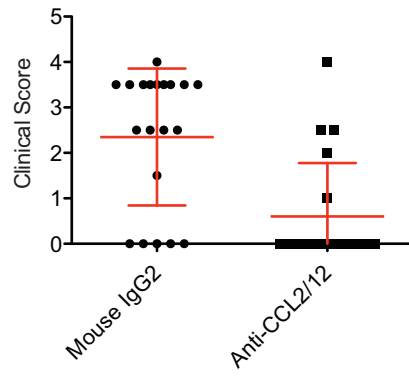**B**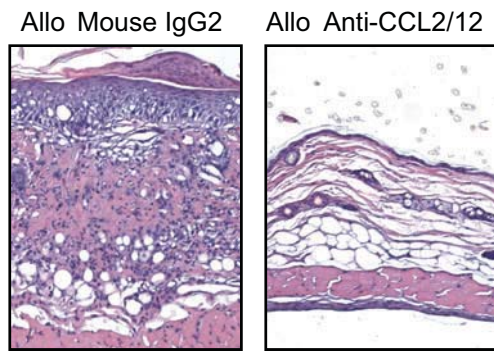

Supplement: mmc5.pdf [file mmc5.pdf]

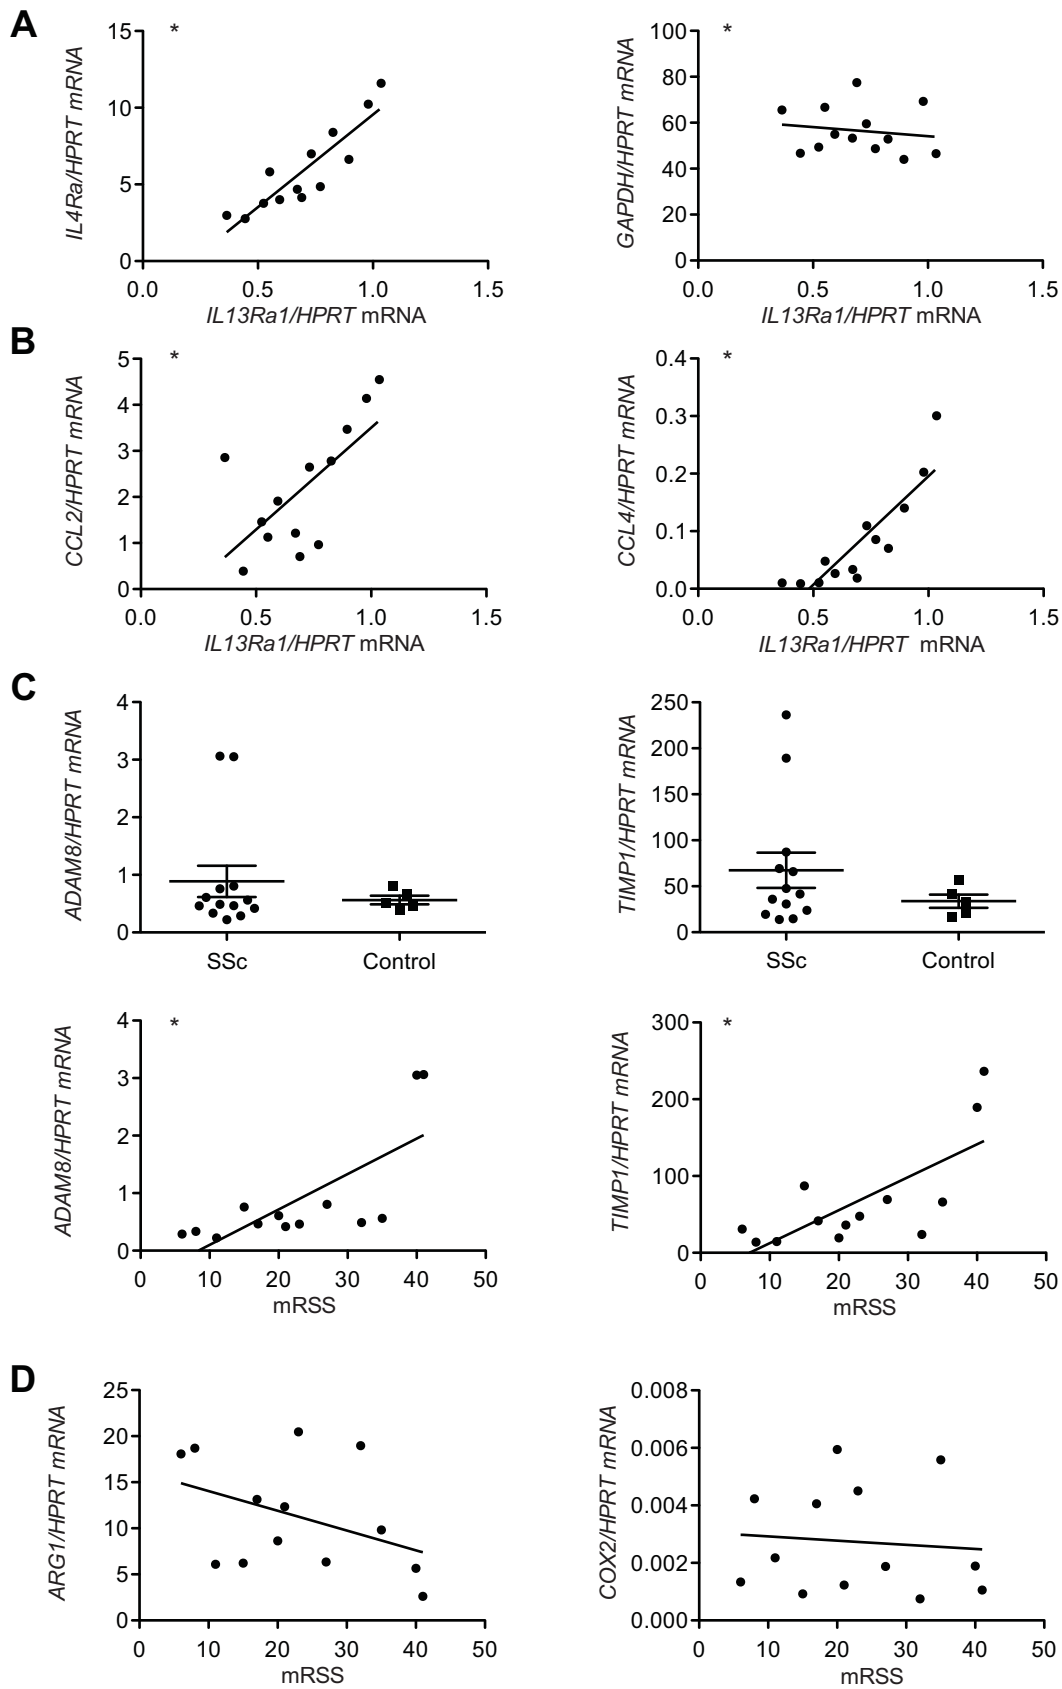

**Supplemental Figure S6**

Supplement: mmc6.pdf [file mmc6.pdf]
